# Supplementary material for: Does Pemetrexed Work in Targetable, Nonsquamous Non-Small-Cell Lung Cancer? A Narrative Review
Source: MDPI journal article supplement (doi:10.3390/cancers12092658), 2020-09-17
Supplement: s1 [file s1]

## Supplementary Table S1. Summary of results from pivotal trials of pemetrexed in unselected patients with NSCLC.

| Study                                                                                                                                                                                                                                                                                                                                                                                                                                                                                                                                                                                                                                                                                      | Study design                              | Line of treatment | Pts                                                     | Treatment                                                                                                                                                                                                                             | Median PFS                                                                                         | Median OS | ORR                                                               |
|--------------------------------------------------------------------------------------------------------------------------------------------------------------------------------------------------------------------------------------------------------------------------------------------------------------------------------------------------------------------------------------------------------------------------------------------------------------------------------------------------------------------------------------------------------------------------------------------------------------------------------------------------------------------------------------------|-------------------------------------------|-------------------|---------------------------------------------------------|---------------------------------------------------------------------------------------------------------------------------------------------------------------------------------------------------------------------------------------|----------------------------------------------------------------------------------------------------|-----------|-------------------------------------------------------------------|
| <p><b>Overall:</b><br/> <b>Cis-pem:</b> 10.3 mo<br/> <b>Cis-gem:</b> 10.3 mo<br/> (HR 0.94; 95% CI 0.84–1.05).<br/> <b>Nonsquamous NSCLC (n=1,000):</b><br/> <b>Cis-pem:</b> 11.8 mo<br/> <b>Cis-gem:</b> 10.4 mo<br/> (HR 0.81; 95% CI 0.70–0.94; p=0.005).<br/> <b>Adenocarcinoma (n=847):</b><br/> <b>Cis-pem:</b> 12.6 mo<br/> <b>Cis-gem:</b> 10.9 mo<br/> (HR 0.84; 95% CI 0.71–0.99; p=0.03).<br/> <b>Large-cell carcinoma (n=153):</b><br/> <b>Cis-pem:</b> 10.4 mo<br/> <b>Cis-gem:</b> 6.7 mo<br/> (HR 0.67; 95% CI 0.48–0.96; p=0.03).<br/> <b>Squamous NSCLC (n=473):</b><br/> <b>Cis-pem:</b> 9.4 mo<br/> <b>Cis-gem:</b> 10.8 mo<br/> (HR 1.23; 95% CI 1.0–1.51; p=0.05)</p> |                                           |                   |                                                         |                                                                                                                                                                                                                                       |                                                                                                    |           |                                                                   |
| Scagliotti et al. [9]                                                                                                                                                                                                                                                                                                                                                                                                                                                                                                                                                                                                                                                                      | Phase III noninferiority randomized study | First-line        | N=1,725<br>Stage IIIB or IV NSCLC<br>Chemotherapy naïve | Cis (75 mg/m <sup>2</sup> ) + pem (500 mg/m <sup>2</sup> ) both on day 1 (n=862)<br>or<br>Cis (75 mg/m <sup>2</sup> on day 1) + gem (1,250 mg/m <sup>2</sup> on days 1 and 8; n=863)<br>Treatment every 3 wks for maximum of 6 cycles | <b>Overall:</b><br><b>Cis-pem:</b> 4.8 mo<br><b>Cis-gem:</b> 5.1 mo<br>(HR 1.04; 95% CI 0.94–1.15) |           | <b>Overall:</b><br><b>Cis-pem:</b> 30.6%<br><b>Cis-gem:</b> 28.2% |

|                      |                                                                                   |                          |                                                                                                                                                 |                                                                                                                                                                         |                                                                                                                                                                                                                                                                                                                                                                                                                                                  |                                                                                                                                                                                                                                                                                                                                                                                                                                                             |                                                                     |
|----------------------|-----------------------------------------------------------------------------------|--------------------------|-------------------------------------------------------------------------------------------------------------------------------------------------|-------------------------------------------------------------------------------------------------------------------------------------------------------------------------|--------------------------------------------------------------------------------------------------------------------------------------------------------------------------------------------------------------------------------------------------------------------------------------------------------------------------------------------------------------------------------------------------------------------------------------------------|-------------------------------------------------------------------------------------------------------------------------------------------------------------------------------------------------------------------------------------------------------------------------------------------------------------------------------------------------------------------------------------------------------------------------------------------------------------|---------------------------------------------------------------------|
| Paz-Ares et al. [10] | Phase III, multicenter, randomized, double-blind, PL-controlled study (PARAMOUNT) | Continuation maintenance | N=539<br>Stage IIIB or IV nonsquamous NSCLC<br>No progression after induction treatment with four 21-day cycles of pemet-                       | Pem (500 mg/m <sup>2</sup> ) + BSC (n=359)<br>or<br>PL + BSC (n=180)<br>Both on day 1 of 21-day cycles until disease progression, toxicity or discontinuation requested | <b>Pem:</b> 4.4 mo (95% CI 4.1–5.7).<br><b>PL:</b> 2.8 mo (95% CI 2.6–3.0)<br>(HR 0.60; 95% CI 0.50–0.73; p<0.001)                                                                                                                                                                                                                                                                                                                               | <b>Pem:</b> 13.9 mo (95% CI 12.8–16.0).<br><b>PL:</b> 11.0 mo (95% CI 10.0–12.5)<br>(HR 0.78; 95% CI 0.64–0.96; p=0.02)                                                                                                                                                                                                                                                                                                                                     |                                                                     |
|                      |                                                                                   |                          |                                                                                                                                                 |                                                                                                                                                                         | <b>Overall:</b><br><b>Pem:</b> 4.3 mo (95% CI 4.1–4.7).<br><b>PL:</b> 2.6 mo (95% CI 1.7–2.8)<br>(HR 0.50; 95% CI 0.42–0.61; p<0.0001).<br><b>Nonsquamous (n=481):</b><br><b>Pem:</b> 4.5 mo (95% CI 4.2–5.6).<br><b>PL:</b> 2.6 mo (95% CI 1.6–2.8)<br>(HR 0.44; 95% CI 0.36–0.55; p<0.0001).<br><b>Squamous (n=182):</b><br><b>Pem:</b> 2.8 mo (95% CI 2.4–4.0).<br><b>PL:</b> 2.6 mo (95% CI 1.6–3.2)<br>(HR 0.69; 95% CI 0.49–0.98; p=0.039) | <b>Overall:</b><br><b>Pem:</b> 13.4 mo (95% CI 11.9–15.9).<br><b>PL:</b> 10.6 mo (95% CI 8.7–12.0)<br>(HR 0.79; 95% CI 0.65–0.95; p=0.012).<br><b>Nonsquamous (n=481):</b><br><b>Pem:</b> 15.5 mo (95% CI 13.2–18.1).<br><b>PL:</b> 10.3 mo (95% CI 8.1–12.0)<br>(HR 0.70; 95% CI 0.56–0.88; p=0.002).<br><b>Squamous (n=182):</b><br><b>Pem:</b> 9.9 mo (95% CI 7.5–11.5).<br><b>PL:</b> 10.8 mo (95% CI 8.5–13.2)<br>(HR 1.07; 95% CI 0.77–1.50; p=0.678) |                                                                     |
| Ciuleanu et al. [11] | Phase III, multicenter, randomized, double-blind, PL-controlled study             | Switch maintenance       | N=663<br>Stage IIIB or IV NSCLC<br>No progression after induction treatment with four 21-day cycles of doublet chemotherapy (not including pem) | Pem (500 mg/m <sup>2</sup> ) + BSC (n=441)<br>or<br>PL + BSC (n=222)<br>Both on day 1 every 3 wks until disease progression                                             |                                                                                                                                                                                                                                                                                                                                                                                                                                                  |                                                                                                                                                                                                                                                                                                                                                                                                                                                             | <b>Overall:</b><br><b>Pem:</b> 6.8%<br><b>PL:</b> 1.8%<br>(p=0.005) |
| Hanna et al. [12]    | Phase III randomized study                                                        | Second-line              | N=571<br>Stage III or IV NSCLC                                                                                                                  | Pem (500 mg/m <sup>2</sup> ; n=283)<br>or                                                                                                                               | <b>Pem:</b> 2.9 mo<br><b>Doc:</b> 2.9 mo                                                                                                                                                                                                                                                                                                                                                                                                         | <b>Pem:</b> 8.3 mo<br><b>Doc:</b> 7.9 mo                                                                                                                                                                                                                                                                                                                                                                                                                    | <b>Pem:</b> 9.1%                                                    |

|  |                                |                                                                                                                                  |                                      |                                      |                            |
|--|--------------------------------|----------------------------------------------------------------------------------------------------------------------------------|--------------------------------------|--------------------------------------|----------------------------|
|  | One prior chemotherapy regimen | Doc (75 mg/m <sup>2</sup> ; n=288)<br>Both on day 1 every 3 wks until disease progression, toxicity or discontinuation requested | (HR 0.97; 95% CI 0.82–1.16; p=0.759) | (HR 0.99; 95% CI 0.82–1.20; p=0.226) | <b>Doc:</b> 8.8% (p=0.105) |
|--|--------------------------------|----------------------------------------------------------------------------------------------------------------------------------|--------------------------------------|--------------------------------------|----------------------------|

Abbreviations: BSC, best supportive care; cis, cisplatin; CI, confidence interval; doc, docetaxel; gem, gemcitabine; HR, hazard ratio; mo, months; NS, not significant; NSCLC, non-small-cell lung cancer; ORR, overall response rate; OS, overall survival; pem, pemetrexed; PFS, progression-free survival; pts, patients; PL, placebo; wks, weeks.

1 **Supplementary Table S2.** Guideline recommendations for the use of pemetrexed in nonsquamous  
2 NSCLC.

| Guideline                 | Early-stage disease                                                                                                                                         | Advanced disease                                                                                                                                                                                                                                                                                                                                                                                                                                                                                                                                                              | Maintenance treatment                                                                                                                                                                                                                                                                                                                                 |
|---------------------------|-------------------------------------------------------------------------------------------------------------------------------------------------------------|-------------------------------------------------------------------------------------------------------------------------------------------------------------------------------------------------------------------------------------------------------------------------------------------------------------------------------------------------------------------------------------------------------------------------------------------------------------------------------------------------------------------------------------------------------------------------------|-------------------------------------------------------------------------------------------------------------------------------------------------------------------------------------------------------------------------------------------------------------------------------------------------------------------------------------------------------|
| NCCN [3]                  | <b>Post-operative treatment</b><br>In combination with car in pts with high-risk, margin-negative stage IB disease who cannot tolerate cis                  | <b>Pts with PS 0–1 and negative or unknown test results for ALK rearrangements, sensitizing EGFR mutations or PD-L1 expression of &lt;50% or unknown</b><br>In combination with cis or car + pemb.<br>If contraindications to pemb, with cis or car ± bev.<br><br><b>Pts with PS 2 and negative or unknown test results for ALK rearrangements, sensitizing EGFR mutations or PD-L1 expression of &lt;50% or unknown</b><br>As single agent or in combination with car                                                                                                        | <b>Continuation therapy<sup>†</sup></b><br>As single agent or with pla/bev if given as the initial regimen.<br><b>Switch therapy<sup>§</sup></b><br>As single agent in pts with negative or unknown test results for ALK rearrangements, sensitizing EGFR mutations or PD-L1 expression of <50% or unknown                                            |
| ESMO [4,56]               | <b>Stage I &amp; II</b><br>Adjuvant to surgery in combination with cis.<br><b>Resectable &amp; unresectable locally advanced</b><br>In combination with cis | <b>First-line treatment in pts with PS 0–1 and EGFR-, ALK-, ROS1- or BRAF-negative disease</b><br>In combination with cis or car + pemb or ate <sup>†</sup> , followed in combination with pemb or ate <sup>†</sup> ; or in combination with cis or car ± bev.<br><b>First-line treatment in pts with PS 2 &amp; &lt;70 years old and selected &gt;70 years and PS 0–2 with EGFR-, ALK-, ROS1- or BRAF-negative disease</b><br>As single agent or in combination with car.<br><br><b>First-line treatment in pts with an EGFR mutation</b><br>In combination with car and gef | <b>Continuation therapy<sup>†</sup></b><br>As single agent following completion of 4–6 cycles of first-line pem-based treatment with no disease progression.<br><b>Switch therapy<sup>§</sup></b><br>± bev                                                                                                                                            |
| Pan-Asian (CSCO-ESMO) [7] |                                                                                                                                                             | <b>First-line treatment in pts with no druggable oncogene driver</b><br>Pemb + pem + pla if PS 0–1 and no contraindication to immunotherapy.<br>Pla doublet (pem preferred to gem or doc) if contraindication to immunotherapy.<br><b>Second-line treatment in pts with no druggable oncogene driver and contraindication to immunotherapy</b><br>As single agent                                                                                                                                                                                                             | <b>Continuation therapy<sup>†</sup></b><br><b>PS 0–1:</b> As single agent following 4 cycles of first-line pem–cis with no disease progression.<br><b>Switch therapy<sup>§</sup></b><br><b>PS 0–1:</b> As single agent ± bev following 4 cycles of first-line non-pem pla-based therapy with no disease progression.<br><b>PS ≥2:</b> As single agent |
| ASCO [57]                 |                                                                                                                                                             | <b>First-line treatment in pts with PS 0–1 and EGFR-, ALK-, or ROS1-negative disease</b><br>In combination with cis or car.<br><b>Second-line treatment in pts with PS 0–1 and EGFR-, ALK- or ROS1-negative disease</b><br>As single agent if not previously given.                                                                                                                                                                                                                                                                                                           | Not covered                                                                                                                                                                                                                                                                                                                                           |

**Third-line treatment in pts with PS  
0–1 and EGFR-, ALK-, or ROS1-  
negative disease**

As single agent.

**Third-line treatment in pts who are  
EGFR positive and have received  
prior pla-based chemotherapy and an  
EGFR-TKI**

As single agent

3       <sup>†</sup>The combination of pem, car/cis and ate is not currently approved by the European Medicines  
4       Agency. <sup>‡</sup>Defined as the use of at least one agent given as first-line treatment. <sup>§</sup>Defined as the use of a  
5       different agent to those given as first-line treatment. Abbreviations: ALK, anaplastic lymphoma  
6       kinase gene; ASCO, American Society of Clinical Oncology; ate, atezolizumab; bev, bevacizumab;  
7       BRAF, B-Raf proto-oncogene; car, carboplatin; cis, cisplatin; CSCO, Chinese Society of Clinical  
8       Oncology; doc, docetaxel; EGFR, epidermal growth factor receptor gene; EGFR-TKI, EGFR-tyrosine  
9       kinase inhibitor; ESMO, European Society for Medical Oncology; gef, gefitinib; gem, gemcitabine;  
10      NCCN, National Comprehensive Cancer Network; NSCLC, non-small-cell lung cancer; PD-L1,  
11      programmed death ligand 1; pem, pemetrexed; pemb, pembrolizumab; pla, platinum; PS,  
12      performance status; pts, patients; ROS1, ROS proto-oncogene 1.

**Supplementary Table S3.** Summary of results from studies of pemetrexed in patients with advanced nonsquamous NSCLC and EGFR gene mutations.

| Study                   | Study design                                                                               | Line of treatment | Pts                                                  | Treatment                                                                                | Median PFS                                                                                                                                                                                                                      | Median OS                                                                                                                                                                     | ORR                                             |
|-------------------------|--------------------------------------------------------------------------------------------|-------------------|------------------------------------------------------|------------------------------------------------------------------------------------------|---------------------------------------------------------------------------------------------------------------------------------------------------------------------------------------------------------------------------------|-------------------------------------------------------------------------------------------------------------------------------------------------------------------------------|-------------------------------------------------|
| First-line treatment    |                                                                                            |                   |                                                      |                                                                                          |                                                                                                                                                                                                                                 |                                                                                                                                                                               |                                                 |
| Pem + pla-based regimen |                                                                                            |                   |                                                      |                                                                                          |                                                                                                                                                                                                                                 |                                                                                                                                                                               |                                                 |
| Jiang et al. [18]       | Retrospective cohort study                                                                 | First-line        | EGFR mutation (n=69).<br>Wild-type disease (n=89)    | Pem-pla (n=96)                                                                           | EGFR-mutant: 8.3 mo<br>Wild-type: 6.7 mo<br>(p=0.004)                                                                                                                                                                           |                                                                                                                                                                               | EGFR-mutant: 43%<br>Wild-type: 21%<br>(p=0.039) |
| Kaneda et al. [19]      | Multicenter retrospective medical record review                                            | First-line        | L858R (n=42).<br>Del-19 (n=36).<br>Wild-type (n=226) | Pem (500 mg/m <sup>2</sup> ) + cis (60–80 mg/m <sup>2</sup> ) every 3 wks for 4–6 cycles | L858R: 9.4 mo<br>(95% CI 6.97–12.60).<br>Del-19: 5.5 mo<br>(95% CI 3.57–8.63; p=0.049 vs. L858R).<br>Wild-type: 4.6 mo<br>(95% CI 4.00–5.07).<br>EGFR mutation status predicted longer PFS: HR 0.78 (95% CI 0.62–0.98; p=0.033) | L858R: 35.6 mo<br>(95% CI 27.6–54.1).<br>Del-19: 40.1 mo<br>(95% CI 27.7–60.0; p=0.64)                                                                                        | L858R: 42.9%<br>Del-19: 36.1%<br>(p=0.21)       |
| Noronha et al. [20]     | Post-hoc analysis of a phase III, double-arm, parallel-group, open-label, randomized study | First-line        | L858R (n=51).<br>Del-19 (n=92)                       | Pem (500 mg/m <sup>2</sup> ) + car (AUC-5) every 3 wks for 6 cycles                      | L858R: 6.1 mo<br>(95% CI 3.82–8.45).<br>Del-19: 5.0 mo<br>(95% CI 3.43–6.64; p=0.599)<br>HR 0.90 (95% CI 0.62–1.32)                                                                                                             | L858R: 18.1 mo<br>(95% CI 13.5–22.6).<br>Del-19: 24.5 mo<br>(95% CI 21.3–27.7; p=0.002).<br>Type of EGFR mutation predicted longer OS: HR 0.43<br>(95% CI 0.26–0.71; p=0.001) | L858R: 42.9%<br>Del-19: 47.7%<br>(p=0.706)      |
| Pem-pla vs. TKI         |                                                                                            |                   |                                                      |                                                                                          |                                                                                                                                                                                                                                 |                                                                                                                                                                               |                                                 |

|                                         |                                            |            |                                              |                                                                                                              |                                                                                                                                                                                                                                                                                                                                                                                                                                                                     |                                                                                                                                                                                        |                                                                                                                                                                                                                            |
|-----------------------------------------|--------------------------------------------|------------|----------------------------------------------|--------------------------------------------------------------------------------------------------------------|---------------------------------------------------------------------------------------------------------------------------------------------------------------------------------------------------------------------------------------------------------------------------------------------------------------------------------------------------------------------------------------------------------------------------------------------------------------------|----------------------------------------------------------------------------------------------------------------------------------------------------------------------------------------|----------------------------------------------------------------------------------------------------------------------------------------------------------------------------------------------------------------------------|
| Patil et al. [21]                       | Open-label randomized parallel-group study | First-line | N=290                                        | Pem (500 mg/m <sup>2</sup> ) + car (AUC-5) (n=145) followed by maintenance pem or Gef (250 mg daily) (n=145) | <b>Pem-car:</b> 5.6 mo (95% CI 4.2–7.0).<br><b>Gef:</b> 8.4 mo (95% CI 6.3–10.5)<br>HR 0.66 (95% CI 0.51–0.85; p=0.001)                                                                                                                                                                                                                                                                                                                                             | <b>Pem-car:</b> 22.6 mo (95% CI 18.6–26.6).<br><b>Gef:</b> 18.0 mo (95% CI 15.2–20.8)<br>HR 1.28 (95% CI 0.92–1.79; p=0.133)                                                           | <b>Pem-car:</b> 45.3%<br><b>Gef:</b> 63.5% (p=0.003)                                                                                                                                                                       |
| Sequist et al. [22]<br>Yang et al. [23] | Phase III randomized study (LUX-Lung 3)    | First-line | N=345                                        | Pem + cis (standard doses) every 3 wks for up to 6 cycles (n=115) or Afa (40 mg/day; n=230)                  | <b>Independent review:</b><br><b>Pem-cis:</b> 6.9 mo<br><b>Afa:</b> 11.1 mo<br>HR 0.58 (95% CI 0.43–0.78; p=0.001).<br><b>Investigator review:</b><br><b>Pem-cis:</b> 6.7 mo<br><b>Afa:</b> 11.1 mo<br>HR 0.49 (95% CI 0.37–0.65; p=0.001).<br><b>For L858R or Del-19 only (n=308):</b><br><b>Pem-cis:</b> 6.9 mo<br><b>Afa:</b> 13.6 mo<br>HR 0.47 (95% CI 0.34–0.65; p=0.001) for independent review; HR 0.41 (95% CI 0.31–0.55; p=0.001) for investigator review | <b>Pem-cis:</b> 28.2 mo (95% CI 20.7–33.2).<br><b>Afa:</b> 28.2 mo (95% CI 24.6–33.6)<br>HR 0.88 (95% CI 0.66–1.17; p=0.39)                                                            | <b>Independent review:</b><br><b>Pem-cis:</b> 23%<br><b>Afa:</b> 56% (p=0.001).<br><b>Investigator review:</b><br><b>Pem-cis:</b> 44%<br><b>Afa:</b> 69% (p=0.001)                                                         |
| Kato et al. [24]                        | Subgroup analysis of LUX-Lung 3 (32)       | First-line | N=83, including: Del-19 (n=39), L858R (n=38) | Pem + cis (standard doses) every 3 wks for up to 6 cycles (n=29) or Afa (40 mg/day; n=54)                    | <b>Overall:</b><br><b>Pem-cis:</b> 6.9 mo<br><b>Afa:</b> 13.8 mo<br>HR 0.38 (95% CI 0.20–0.70; p=0.0014).<br><b>L858R or Del-19:</b><br><b>Pem-cis:</b> 6.9 mo<br><b>Afa:</b> 13.8 mo<br>HR 0.28 (95% CI 0.15–0.52; p<0.0001).                                                                                                                                                                                                                                      | <b>Overall:</b><br><b>Pem-cis:</b> 35.8 mo<br><b>Afa:</b> 46.9 mo<br>HR 0.75 (95% CI 0.40–1.43; p=0.379).<br><b>L858R or Del-19:</b><br><b>Pem-cis:</b> 35.0 mo<br><b>Afa:</b> 46.9 mo | <b>Overall:</b><br><b>Pem-cis:</b> 20.7%<br><b>Afa:</b> 61.6%<br>OR 6.52 (95% CI 2.22–19.14; p=0.0007).<br><b>L858R or Del-19:</b><br><b>Pem-cis:</b> 22.2%<br><b>Afa:</b> 64.0%<br>OR 6.22 (95% CI 2.12–18.24; p=0.0009). |

|                                             |                                                        |            |                                                                                                                                                                                                                         |                                                                                                                   |                                                                                                                                                                                                                                                                                                                                                                                                                                                                                                  |  |                                                                                                                                                                                                                       |  |                                                             |  |
|---------------------------------------------|--------------------------------------------------------|------------|-------------------------------------------------------------------------------------------------------------------------------------------------------------------------------------------------------------------------|-------------------------------------------------------------------------------------------------------------------|--------------------------------------------------------------------------------------------------------------------------------------------------------------------------------------------------------------------------------------------------------------------------------------------------------------------------------------------------------------------------------------------------------------------------------------------------------------------------------------------------|--|-----------------------------------------------------------------------------------------------------------------------------------------------------------------------------------------------------------------------|--|-------------------------------------------------------------|--|
|                                             |                                                        |            | <b>L858R:</b><br><b>Pem–cis:</b> 8.3 mo<br><b>Afa:</b> 13.7 mo<br>HR 0.50 (95% CI 0.20–1.25;<br>p=0.131).<br><b>Del-19:</b><br><b>Pem–cis:</b> 3.1 mo<br><b>Afa:</b> 16.4 mo<br>HR 0.16 (95% CI 0.06–0.39;<br>p<0.0001) |                                                                                                                   | HR 0.57 (95% CI<br>0.29–1.12;<br>p=0.097).<br><b>L858R:</b><br><b>Pem–cis:</b> 40.3 mo<br><b>Afa:</b> 41.7 mo<br>HR 1.13 (95% CI<br>0.40–3.21;<br>p=0.821).<br><b>Del-19:</b><br><b>Pem–cis:</b> 31.5 mo<br><b>Afa:</b> 46.9 mo<br>HR 0.34 (95% CI<br>0.13–0.87; p=0.018)                                                                                                                                                                                                                        |  | <b>L858R:</b><br><b>Pem–cis:</b> 18.2%<br><b>Afa:</b> 59.3%<br>OR 6.55 (95% CI 1.18–<br>36.32; p=0.032).<br><b>Del-19:</b><br><b>Pem–cis:</b> 25.0%<br><b>Afa:</b> 69.6%<br>OR 6.86 (95% CI 1.63–<br>28.90; p=0.0087) |  |                                                             |  |
| Pem or pem–pla + gef vs. gef                |                                                        |            |                                                                                                                                                                                                                         |                                                                                                                   |                                                                                                                                                                                                                                                                                                                                                                                                                                                                                                  |  |                                                                                                                                                                                                                       |  |                                                             |  |
|                                             |                                                        |            |                                                                                                                                                                                                                         |                                                                                                                   | <b>Overall:</b><br><b>Pem + gef:</b> 15.8 mo<br>(95% CI 12.6–18.3).<br><b>Gef:</b> 10.9 mo<br>(95% CI 9.7–13.8).<br>Adjusted HR 0.68<br>(95% CI 0.48–0.96;<br>one-sided p=0.014,<br>two-sided p=0.029).<br><b>Del-19:</b><br><b>Pem + gef:</b> 17.1 mo<br>(95% CI 13.3–21.7).<br><b>Gef:</b> 11.1 mo<br>(95% CI 9.0–16.8).<br>HR 0.67 (95% CI 0.43–1.05;<br>one-sided p=0.039,<br>two-sided p=0.078).<br><b>L858R:</b><br><b>Pem + gef:</b> 12.6 mo<br>(95% CI 8.5–21.2).<br><b>Gef:</b> 10.9 mo |  | <b>Pem + gef:</b> 43.4<br>mo (95% CI 33.4–<br>50.8).<br><b>Gef:</b> 36.8 mo<br>(95% CI 26.7–<br>42.6).<br>Adjusted HR 0.77<br>(95% CI 0.5–1.2;<br>p=0.105)                                                            |  | <b>Overall:</b><br><b>Pem + gef:</b> 80%<br><b>Gef:</b> 74% |  |
| Cheng et<br>al. [25]<br>Yang et al.<br>[26] | Multicenter<br>randomized phase II<br>open-label study | First-line | N=191<br>Subgroup<br>analysis<br>according to<br>Del-19 or L858R<br>(n not given)                                                                                                                                       | Pem (500 mg/m <sup>2</sup> ) every<br>3 wks + gef (250 mg<br>daily) (n=126)<br>or<br>Gef (250 mg daily)<br>(n=65) |                                                                                                                                                                                                                                                                                                                                                                                                                                                                                                  |  |                                                                                                                                                                                                                       |  |                                                             |  |



|                                         |                                          |                                        |                                                         |                                                                                                                                                  |                                                                                                                                                                                                                                                                                                                                  |                                                                                                                                                                                                                |                                                                                                    |
|-----------------------------------------|------------------------------------------|----------------------------------------|---------------------------------------------------------|--------------------------------------------------------------------------------------------------------------------------------------------------|----------------------------------------------------------------------------------------------------------------------------------------------------------------------------------------------------------------------------------------------------------------------------------------------------------------------------------|----------------------------------------------------------------------------------------------------------------------------------------------------------------------------------------------------------------|----------------------------------------------------------------------------------------------------|
|                                         |                                          |                                        |                                                         |                                                                                                                                                  | (95% CI 8.2–12.5).<br>HR 0.58 (95% CI 0.33–1.01;<br>one-sided p=0.027,<br>two-sided p=0.054)                                                                                                                                                                                                                                     |                                                                                                                                                                                                                |                                                                                                    |
| Seike et al.<br>[27]                    | Randomized phase III<br>open-label study | First-line                             | N=342                                                   | Pem (500 mg/m <sup>2</sup> ) + car<br>(AUC-5) every 3 wks +<br>gef (250 mg daily)<br>(n=170)<br>or<br>Gef (250 mg daily)<br>(n=172)              | <b>Pem + car + gef:</b> 20.9 mo<br>(95% CI 18.0–24.2).<br><b>Gef:</b> 11.2 mo<br>(95% CI 9.0–13.4).<br>HR 0.49 (95% CI 0.39–0.62;<br>p<0.001)                                                                                                                                                                                    | <b>Pem + car + gef:</b><br>52.2 mo<br><b>Gef:</b> 38.8 mo<br>HR 0.70 (p=0.013)                                                                                                                                 |                                                                                                    |
| Noronha et<br>al. [28]                  | Randomized phase III<br>open-label study | First-line                             | N=350                                                   | Pem (500 mg/m <sup>2</sup> ) + car<br>(AUC-5) every 3 wks +<br>gef (250 mg daily) for 4<br>cycles (n=173)<br>or<br>Gef (250 mg daily)<br>(n=177) | <b>Pem + car + gef:</b> 16.0 mo<br>(95% CI 13.5–18.5).<br><b>Gef:</b> 8.0 mo<br>(95% CI 7.0–9.0).<br>HR 0.51 (95% CI 0.39–0.66;<br>p<0.001)                                                                                                                                                                                      | <b>Pem + car + gef:</b><br>not reached.<br><b>Gef:</b> 17.0 mo<br>(95% CI 13.5–<br>20.5).<br>HR 0.45 (95% CI<br>0.31–0.65; p<0.001)                                                                            | <b>Radiologic response<br/>rate:</b><br><b>Pem + car + gef:</b> 75%<br><b>Gef:</b> 63%<br>(p=0.01) |
| <b>Second- and later-line treatment</b> |                                          |                                        |                                                         |                                                                                                                                                  |                                                                                                                                                                                                                                                                                                                                  |                                                                                                                                                                                                                |                                                                                                    |
| <b>Pem-pla or pem monotherapy</b>       |                                          |                                        |                                                         |                                                                                                                                                  |                                                                                                                                                                                                                                                                                                                                  |                                                                                                                                                                                                                |                                                                                                    |
| Jiang et al.<br>[18]                    | Retrospective cohort<br>study            | Second- or<br>later-line               | EGFR mutation<br>(n=69),<br>Wild-type<br>disease (n=89) | Pem-pla (n=96),<br>Pem (n=62)                                                                                                                    | <b>Any-line doublet:</b><br><b>EGFR-mutant:</b> 7.5 mo<br><b>Wild-type:</b> 6.4 mo<br>(p=0.051).<br><b>Any-line monotherapy:</b><br><b>EGFR-mutant:</b> 4.4 mo<br><b>Wild-type:</b> 3.7 mo<br>(p=0.115).<br><b>Second- or third-line<br/>monotherapy:</b><br><b>EGFR-mutant:</b> 3.7 mo<br><b>Wild-type:</b> 3.2 mo<br>(p=0.078) | <b>Second-line doublet:</b><br><b>EGFR-mutant:</b> 27%<br><b>Wild-type:</b> 13%<br>(p=0.603).<br><b>Second- or third-line<br/>monotherapy:</b><br><b>EGFR-mutant:</b> 13%<br><b>Wild-type:</b> 8%<br>(p=0.655) |                                                                                                    |
| Wu et al.<br>[29]                       | Prospective cohort<br>study              | Second- or<br>later-line<br>(following | EGFR mutation<br>(n=93),<br>including:                  | Pem (500 mg/m <sup>2</sup> ) every<br>3 wks                                                                                                      | <b>EGFR-mutant:</b> 3.9 mo<br>(95% CI 3.1–4.7).<br><b>Wild-type:</b> 2.3 mo                                                                                                                                                                                                                                                      | <b>EGFR-mutant:</b><br>30.8 mo (95% CI<br>28.1–33.5). <sup>†</sup>                                                                                                                                             | <b>EGFR-mutant:</b> 12.9%                                                                          |

|                                    |                                                  |                                        |                                                                              |                                                                                                                                                                     |                                                                                                                                                                                                                                                      |                                                                                                                                                                                          |                                                                                                                                                                                                                                                                                                                            |
|------------------------------------|--------------------------------------------------|----------------------------------------|------------------------------------------------------------------------------|---------------------------------------------------------------------------------------------------------------------------------------------------------------------|------------------------------------------------------------------------------------------------------------------------------------------------------------------------------------------------------------------------------------------------------|------------------------------------------------------------------------------------------------------------------------------------------------------------------------------------------|----------------------------------------------------------------------------------------------------------------------------------------------------------------------------------------------------------------------------------------------------------------------------------------------------------------------------|
|                                    |                                                  | pem-based therapy)                     | Del-19 (n=43),<br>L858R (n=37),<br>Wild-type disease (n=63)                  |                                                                                                                                                                     | (95% CI 2.0–2.6; p=0.03 vs. EGFR-mutant).<br><b>L858R:</b> 4.0 mo (95% CI 3.3–4.7).<br><b>Del-19:</b> 3.3 mo (95% CI 1.6–5.0; p=0.641 vs. L858R).<br><b>EGFR mutation vs. wild-type was associated with PFS:</b> HR 0.68 (95% CI 0.49–0.94; p=0.021) | <b>Wild-type:</b> 25.8 mo (95% CI 17.7–33.9; p=0.439 vs. EGFR-mutant).<br><b>L858R:</b> 29.3 mo (95% CI 26.9–31.7).<br><b>Del-19:</b> 34.1 mo (95% CI 25.8–42.4; p=0.177 vs. L858R)      | <b>Wild-type:</b> 1.6% (p=0.016 vs. EGFR-mutant).<br><b>L858R:</b> 10.8%<br><b>Del-19:</b> 14.0% (p=0.745 vs. L858R).<br><b>Classic mutation (Del-19 or L858R):</b> 12.5%<br><b>Nonclassic mutation:</b> 15.4% (p=0.673 vs. classic).<br><b>Second-, third- and fourth-line in EGFR-mutant:</b> 8.8%, 8.6%, 7.8% (p=0.980) |
| Joshi et al. [30]                  | Post-hoc analysis of a randomized study          | Second-line (following first-line gef) | L858R (n=22),<br>Del-19 (n=33)                                               | Pem (500 mg/m <sup>2</sup> ) + car (AUC-5)                                                                                                                          | <b>L858R:</b> 4.77 mo (95% CI 1.37–8.16).<br><b>Del-19:</b> 5.90 mo (95% CI 4.27–7.53).<br>HR 0.56 (95% CI 0.27–1.16; p=0.121)                                                                                                                       | <b>L858R:</b> 6.2 mo (95% CI 4.22–8.12).<br><b>Del-19:</b> 11.8 mo (95% CI 9.92–13.68; p=0.024).<br><b>Type of EGFR mutation did not predict OS:</b> HR 0.36; 95% CI 0.09–1.44; p=0.149) | <b>L858R:</b> 33.3%<br><b>Del-19:</b> 39.3% (p=0.752)                                                                                                                                                                                                                                                                      |
| <b>Pem-cis-gef vs. pem-cis-PL</b>  |                                                  |                                        |                                                                              |                                                                                                                                                                     |                                                                                                                                                                                                                                                      |                                                                                                                                                                                          |                                                                                                                                                                                                                                                                                                                            |
| Soria et al. [31]; Mok et al. [32] | Phase III multicenter randomized study (IMPRESS) | Second-line (following first-line gef) | N=265<br>T790M mutation-positive (n=142),<br>T790M mutation-negative (n=105) | Pem-cis (500 mg/m <sup>2</sup> and 75 mg/m <sup>2</sup> , respectively, every 3 wks) + gef (250 mg orally OD; n=133)<br>or<br>Pem-cis + PL (n=132)<br>For ≤6 cycles | <b>Gef:</b> 5.4 mo (95% CI 4.5–5.7).<br><b>PL:</b> 5.4 mo (95% CI 4.6–5.5).<br>HR 0.86 (95% CI 0.65–1.13; p=0.27).<br><b>T790M-positive:</b><br><b>Gef:</b> 4.6 mo                                                                                   | <b>Gef:</b> 13.4 mo<br><b>PL:</b> 19.5 mo (HR 1.44; 95% CI 1.07–1.94; p=0.016).<br><b>T790M-positive:</b><br><b>Gef:</b> 10.8 mo<br><b>PL:</b> 14.1 mo                                   | <b>Gef:</b> 31.6%<br><b>PL:</b> 34.1%<br>OR 0.92 (95% CI 0.55–1.55; p=0.76)                                                                                                                                                                                                                                                |

|                         |                                    |                                        |                                     |                                                                                                                                                                |                                                                                                                                                                                                                                                                                                      |                                                                                                                                                                                                                                                                                                           |                                                                                                                                                                                                                                                                            |
|-------------------------|------------------------------------|----------------------------------------|-------------------------------------|----------------------------------------------------------------------------------------------------------------------------------------------------------------|------------------------------------------------------------------------------------------------------------------------------------------------------------------------------------------------------------------------------------------------------------------------------------------------------|-----------------------------------------------------------------------------------------------------------------------------------------------------------------------------------------------------------------------------------------------------------------------------------------------------------|----------------------------------------------------------------------------------------------------------------------------------------------------------------------------------------------------------------------------------------------------------------------------|
|                         |                                    |                                        |                                     | PL: 5.3 mo<br>HR 0.97 (95% CI 0.67–1.42; p=0.883).<br><b>T790M-negative:</b><br><b>Gef:</b> 6.7 mo<br><b>PL:</b> 5.4 mo<br>HR 0.67 (95% CI 0.43–1.03; p=0.075) | HR 1.49 (95% CI 1.02–2.21; p=0.04).<br><b>T790M-negative:</b><br><b>Gef:</b> 21.4 mo<br><b>PL:</b> 22.5 mo<br>HR 1.15 (95% CI 0.68–1.94; p=0.609)                                                                                                                                                    |                                                                                                                                                                                                                                                                                                           |                                                                                                                                                                                                                                                                            |
| Pem vs. non-pem regimen |                                    |                                        |                                     |                                                                                                                                                                |                                                                                                                                                                                                                                                                                                      |                                                                                                                                                                                                                                                                                                           |                                                                                                                                                                                                                                                                            |
| Han et al. [33]         | Systematic review of eight studies | Second-line (following TKI therapy)    | 1,193 pts, of whom 640 received pem | Pem monotherapy (three studies, 114 pts)<br>Pem-pla (seven studies, 526 pts)<br>Any pem (n=148) vs. non-pem (n=97; three studies)                              | <b>Any pem regimen:</b><br>weighted median PFS 5.1 mo.<br><b>Non-pem regimen:</b><br>weighted median PFS 3.2 mo.<br><b>Any pem vs. non-pem by study:</b><br>4.2 vs. 2.7 mo (HR 0.54; 95% CI 0.34–0.86; p=0.009).<br>6.4 vs. 4.1 mo (HR 0.47; 95% CI 0.26–0.84; p=0.010).<br>4.7 vs. 3.3 mo (p=0.620) | <b>Any pem regimen:</b><br>weighted median OS 15.9 mo.<br><b>Non-pem regimen:</b><br>weighted median OS 11.1 mo.<br><b>Any pem vs. non-pem by study:</b><br>15.1 vs. 11.0 mo (HR 0.92; 95% CI 0.50–1.68; p=0.785).<br>19.2 vs. 14.1 mo (HR 0.50; 95% CI 0.22–1.13; p=0.097).<br>15.1 vs. 8.1 mo (p=0.168) | <b>Any pem regimen:</b><br>weighted ORR 30.2%<br><b>Non-pem regimen:</b><br>weighted ORR 18.3%<br><b>Any pem vs. non-pem (two studies):</b><br>weighted ORR 30.2 vs. 18.3%<br><b>Any pem vs. non-pem by study:</b><br>32.4 vs. 17.4% (p=0.111)<br>26.0 vs. 20.0% (p=0.799) |
| Yang et al. [34]        | Retrospective cohort study         | Second-line (following first-line gef) | N=98                                | Erl (n=12)<br>Pem (n=2)<br>Gem (n=2)<br>Vin (n=21)<br>Tax (n=1)<br>Pem-pla (n=34)<br>Gem-pla (n=16)                                                            | <b>Pem-pla:</b> 6.4 mo<br><b>Pla doublet no pem:</b> 4.1 mo (p=0.008 vs. pem-pla).<br><b>Pem-pla vs. no pem doublet predicted longer PFS:</b> HR 0.42 (95% CI 0.23–0.77)                                                                                                                             | <b>Pem-pla:</b> 19.2 mo<br><b>Pla doublet no pem:</b> 14.1 mo (p=0.164).<br><b>Pem-pla vs. no pem doublet</b>                                                                                                                                                                                             | <b>Pem-pla:</b> 24%<br><b>Pla doublet no pem:</b> 12% (p=0.234)                                                                                                                                                                                                            |

|                        |                                                              |                                     |                                     |                                                                           |                                                                                  |                                                                           |
|------------------------|--------------------------------------------------------------|-------------------------------------|-------------------------------------|---------------------------------------------------------------------------|----------------------------------------------------------------------------------|---------------------------------------------------------------------------|
|                        |                                                              |                                     |                                     | Vin-pla (n=7)<br>Tax-pla (n=3)                                            | <b>predicted longer OS: HR 0.50</b><br>(95% CI 0.22–1.13; p=0.097)               |                                                                           |
| <b>Pem-pla vs. osi</b> |                                                              |                                     |                                     |                                                                           |                                                                                  |                                                                           |
| Mok et al.<br>[35]     | Phase III, multicenter, randomized, open-label study (AURA3) | Second-line (following TKI therapy) | EGFR-T790M-positive disease (n=419) | Pem (500 mg/m²) + car (AUC-5) or cis (75 mg/m²) every 3 wks for ≤6 cycles | <b>Pem-car/cis: 4.4 mo</b><br>(95% CI 4.2–5.6).                                  | <b>Pem-car/cis: 31%</b><br>(95% CI 24–40).                                |
|                        |                                                              |                                     |                                     | or<br>Osi (80 mg OD)                                                      | <b>Osi: 10.1 mo</b><br>(95% CI 8.3–12.3).<br>HR 0.30 (95% CI 0.23–0.41; p<0.001) | <b>Osi: 71%</b><br>(95% CI 65–76).<br>OR 5.39 (95% CI 3.47–8.48; p<0.001) |

<sup>†</sup>In this study, OS was defined as the period from the date of first-line treatment to the date of death, last follow-up, or the final study follow-up day. Abbreviations: afa, afatinib; AUC, area under the concentration–time curve; car, carboplatin; cis, cisplatin; CI, confidence interval; CNS, central nervous system; Del-19, EGFR gene exon 19 deletion; EGFR, epidermal growth factor receptor; erl, erlotinib; gef, gefitinib; gem, gemcitabine; HR, hazard ratio; L858R, Leu858Arg point mutation in exon 21; mo, months; NSCLC, non-small-cell lung cancer; NS, not significant; OD, once daily; OR, odds ratio; ORR, overall response rate; OS, overall survival; osi, osimertinib; pem, pemetrexed; PFS, progression-free survival; PL, placebo; pla, platinum; pts, patients; tax, taxane; TKI, tyrosine kinase inhibitor; vin, vinorelbine; wks, weeks.

20

**Supplementary Table S4.** Summary of results from studies of pemetrexed in patients with advanced nonsquamous NSCLC and ALK rearrangements.

| Study                     | Study design                           | Line of treatment                                                                                            | Pts                                                                                                | Treatment                                                                                                    | Median PFS                                                                                                                                                                                          | Median OS                                  | ORR                                            |
|---------------------------|----------------------------------------|--------------------------------------------------------------------------------------------------------------|----------------------------------------------------------------------------------------------------|--------------------------------------------------------------------------------------------------------------|-----------------------------------------------------------------------------------------------------------------------------------------------------------------------------------------------------|--------------------------------------------|------------------------------------------------|
| First-line treatment      |                                        |                                                                                                              |                                                                                                    |                                                                                                              |                                                                                                                                                                                                     |                                            |                                                |
| Pem + pla-based regimen   |                                        |                                                                                                              |                                                                                                    |                                                                                                              |                                                                                                                                                                                                     |                                            |                                                |
| Ma et al. [36]            | Retrospective chart review             | First-line                                                                                                   | N=52                                                                                               | Pem (500 mg/m <sup>2</sup> ) alone or + cis (75 mg/m <sup>2</sup> ) or + car (AUC 4–5 mg/mL/min) every 3 wks | 9.5 mo (95% CI 7.45–11.54)                                                                                                                                                                          | 20.7 mo (95% CI 14.13–27.33)               | 34.6%                                          |
| Shaw et al. [37]          | Multicenter retrospective chart review | Any-line (including first-line; prior first-line treatment for second- and later-line therapy not specified) | ALK-positive (n=121)<br>ALK-negative (n=266), including 79 KRAS-positive and 187 KRAS-negative pts | Pem alone or as combination therapy                                                                          | First-line pem–pla:<br>ALK-positive: 8.5 mo (95% CI 5.9–10.9).<br>ALK-negative, KRAS-positive: 4.1 mo (p=0.004 vs. ALK-positive).<br>ALK-negative, KRAS-negative: 5.4 mo (p=0.018 vs. ALK-positive) |                                            |                                                |
| Park et al. [38]          | Cohort study                           | Any-line (including first-line, and second- and later-line following chemotherapy)                           | ALK-positive (n=52)<br>EGFR-positive (n=188)<br>KRAS-positive (n=34)<br>Wild-type disease (n=168)  | Pem alone or as combination therapy                                                                          | Pem combination (mainly first-line):<br>ALK-positive: 7.8 mo<br>EGFR-positive: 5.3 mo<br>KRAS-positive: 4.6 mo<br>Wild-type: 4.3 mo (p=0.227)                                                       |                                            |                                                |
| Pem- vs. non-pem regimens |                                        |                                                                                                              |                                                                                                    |                                                                                                              |                                                                                                                                                                                                     |                                            |                                                |
| Jo et al. [39]            | Retrospective cohort study             | First-line                                                                                                   | N=126                                                                                              | Pem-based chemotherapy (n=48) or non-pem-based chemotherapy (n=78)                                           | Pem: 6.6 mo (95% CI 5.1–8.1).<br>Non-pem: 3.8 mo                                                                                                                                                    | Pem: 66.5 mo<br>Non-pem: 49.2 mo (p=0.919) | Pem: 44.7%<br>Non-pem: 14.3% (p<0.001 vs. pem) |

|                                        |                                                        |                                                         |                     |                                                                                                                                                                        |                                                                                                                                |                                                                                                                                                                                                                                                                                                         |
|----------------------------------------|--------------------------------------------------------|---------------------------------------------------------|---------------------|------------------------------------------------------------------------------------------------------------------------------------------------------------------------|--------------------------------------------------------------------------------------------------------------------------------|---------------------------------------------------------------------------------------------------------------------------------------------------------------------------------------------------------------------------------------------------------------------------------------------------------|
|                                        |                                                        |                                                         |                     | (95% CI 2.8–4.8; p=0.001 vs. pem).<br><b>Non-pem associated with shorter PFS: HR 1.91</b><br>(95% CI 1.27–2.87; p=0.002)                                               |                                                                                                                                |                                                                                                                                                                                                                                                                                                         |
| <i>Pem–pla vs. TKIs</i>                |                                                        |                                                         |                     |                                                                                                                                                                        |                                                                                                                                |                                                                                                                                                                                                                                                                                                         |
| Solomon et al. [40]                    | Phase III, open-label, randomized study (PROFILE 1014) | First-line                                              | N=343               | Pem (500 mg/m <sup>2</sup> ) + cis (75 mg/m <sup>2</sup> ) or car (AUC 5–6) every 3 wks for ≤6 cycles (n=171) or<br>Cri (250 mg bid orally; n=172)                     | <b>Chemotherapy:</b> 7.0 mo (95% CI 6.8–8.2).<br><b>Cri:</b> 10.9 mo (95% CI 8.3–13.9).<br>HR 0.45 (95% CI 0.35–0.60; p<0.001) | <b>HR for death with cri:</b> 0.82 (95% CI 0.54–1.26; p=0.36).<br><b>Probability of 1-year survival:</b><br><b>Chemotherapy:</b> 79% (95% CI 71–84).<br><b>Cri:</b> 84% (95% CI 77–89).<br><b>HR for death with cri:</b> 0.60 (95% CI 0.27–1.42; Wilcoxon test); 0.67 (95% CI 0.28–1.48; log-rank test) |
| Soria et al. [41]                      | Phase III open-label randomized study (ASCEND-4)       | First-line                                              | N=376               | Pem (500 mg/m <sup>2</sup> ) + cis (75 mg/m <sup>2</sup> ) or car (AUC 5–6) every 3 wks for 4 cycles followed by maintenance pem (n=187) or<br>Cer (750 mg/day; n=189) | <b>Pem–cis/car:</b> 8.1 mo (95% CI 5.8–11.1).<br><b>Cer:</b> 16.6 mo (95% CI 12.6–27.2) (HR 0.55; 95% CI 0.42–0.73; p<0.00001) | <b>Immature data:</b><br><b>Pem–cis/car:</b> 26.2 mo (95% CI 22.8–not estimable).<br><b>Cer:</b> Not reached (95% CI 29.3–not estimable) (HR 0.73; 95% CI 0.50–1.08; p=0.056)                                                                                                                           |
| <b>Second- or later-line treatment</b> |                                                        |                                                         |                     |                                                                                                                                                                        |                                                                                                                                |                                                                                                                                                                                                                                                                                                         |
| Lee et al. [42]                        | Cohort study                                           | Second- or later-line (following systemic chemotherapy, | ALK-positive (n=15) | Pem (500 mg/m <sup>2</sup> ) every 3 wks                                                                                                                               | <b>Overall: ALK-positive:</b> 46.7%                                                                                            |                                                                                                                                                                                                                                                                                                         |

|                  |                                        |                                                                                                              |                                                                                                    |                                     |                                                                                                                                                                                                                                                                                                                                                                                                                                                                                                                                                                |
|------------------|----------------------------------------|--------------------------------------------------------------------------------------------------------------|----------------------------------------------------------------------------------------------------|-------------------------------------|----------------------------------------------------------------------------------------------------------------------------------------------------------------------------------------------------------------------------------------------------------------------------------------------------------------------------------------------------------------------------------------------------------------------------------------------------------------------------------------------------------------------------------------------------------------|
|                  |                                        | including a pla-based doublet)                                                                               | EGFR-positive (n=43)<br>Wild-type disease (n=37)                                                   |                                     | <b>EGFR-positive:</b><br>4.7%<br><b>Wild-type:</b> 16.2%<br>(p=0.001 for difference between the three groups).<br><b>Second-line (n=38):</b><br><b>ALK-positive:</b><br>50.0%<br><b>EGFR-positive:</b> 0%<br><b>Wild-type:</b> 19.2%<br>(p=0.096 for difference between the three groups).<br><b>≥Third-line (n=57):</b><br><b>ALK-positive:</b><br>44.4%<br><b>EGFR-positive:</b><br>5.4%<br><b>Wild-type:</b> 9.1%<br>(p=0.006 for difference between the three groups).<br><b>ALK associated with favorable ORR:</b> HR 0.07<br>(95% CI 0.01–0.32; p=0.001) |
| Shaw et al. [37] | Multicenter retrospective chart review | Any-line (including first-line; prior first-line treatment for second- and later-line therapy not specified) | ALK-positive (n=121)<br>ALK-negative (n=266), including 79 KRAS-positive and 187 KRAS-negative pts | Pem alone or as combination therapy | <b>Single-agent pem secondor third-line:</b><br><b>ALK-positive:</b> 4.4 mo (95% CI 2.1–9.0).<br><b>ALK-negative, KRAS-positive:</b> 7.8 mo (p=0.606 vs. ALK-positive).                                                                                                                                                                                                                                                                                                                                                                                        |

|                    |                                        |                                                                                                              |                                                                                                   |                                                                                                                   |                                                                                                                                                                                                                                                                             |                                                                                                                                                                                                                                                                                                                                                                                                                             |  |
|--------------------|----------------------------------------|--------------------------------------------------------------------------------------------------------------|---------------------------------------------------------------------------------------------------|-------------------------------------------------------------------------------------------------------------------|-----------------------------------------------------------------------------------------------------------------------------------------------------------------------------------------------------------------------------------------------------------------------------|-----------------------------------------------------------------------------------------------------------------------------------------------------------------------------------------------------------------------------------------------------------------------------------------------------------------------------------------------------------------------------------------------------------------------------|--|
|                    |                                        |                                                                                                              |                                                                                                   |                                                                                                                   | ALK-negative, KRAS-negative: 3.8 mo<br>(p=0.787 vs. ALK-positive)                                                                                                                                                                                                           |                                                                                                                                                                                                                                                                                                                                                                                                                             |  |
| Park et al. [38]   | Cohort study                           | Any-line (including first-line, and second- and later-line following chemotherapy)                           | ALK-positive (n=52)<br>EGFR-positive (n=188)<br>KRAS-positive (n=34)<br>Wild-type disease (n=168) | Pem alone or as combination therapy                                                                               | <b>Pem monotherapy:</b><br>ALK-positive: 8.7 mo<br>EGFR-positive: 2.0 mo<br>KRAS-positive: 1.6 mo<br>Wild-type: 1.9 mo (p<0.001).<br>HR for ALK-positive vs. other groups: 0.39 vs. EGFR-positive, 0.42 vs. KRAS-positive, 0.43 vs. wild-type (p<0.001 for all comparisons) | <b>Pem monotherapy (second- or later-line):</b><br>ALK-positive: 29.0%<br>EGFR-positive: 8.4%<br>KRAS-positive: 8.7%<br>Wild-type: 11.8% (p=0.013)                                                                                                                                                                                                                                                                          |  |
| Pem/doc vs. cri    |                                        |                                                                                                              |                                                                                                   |                                                                                                                   |                                                                                                                                                                                                                                                                             |                                                                                                                                                                                                                                                                                                                                                                                                                             |  |
| Shaw et al. [43]   | Phase III open-label randomized study  | Second-line (following pla-based chemotherapy)                                                               | 347 ALK-positive pts who progressed on first-line pla-based therapy                               | Pem (500 mg/m <sup>2</sup> ) or doc (75 mg/m <sup>2</sup> ) every 3 wks (n=174) or Cri (250 mg orally bid; n=173) | <b>Pem/doc:</b> 3.0 mo (95% CI 2.6–4.3).<br><b>Cri:</b> 7.7 mo (95% CI 6.0–8.8).<br><b>HR for disease progression or death with cri:</b> 0.49 (95% CI 0.37–0.64; p<0.001) vs. pem/doc; 0.59 (95% CI 0.43–0.80; p<0.001) vs. pem; 0.30 (95% CI 0.21–0.43; p<0.001) vs. doc   | <b>Pem/doc:</b> 22.8 mo (95% CI 18.6–not reached).<br><b>Cri:</b> 20.3 mo (95% CI 18.1–not reached).<br>HR 1.02 (95% CI 0.68–1.54; p=0.54)<br><b>ITT population:</b><br><b>Pem/doc:</b> 20% (95% CI 14–26).<br><b>Cri:</b> 65% (95% CI 58–72; p<0.001).<br><b>As-treated population:</b><br><b>Pem:</b> 29% (95% CI 21–39).<br><b>Doc:</b> 7% (95% CI 2–16).<br><b>Cri:</b> 66% (95% CI 58–73; p<0.001 vs. pem and vs. doc) |  |
| Any-line treatment |                                        |                                                                                                              |                                                                                                   |                                                                                                                   |                                                                                                                                                                                                                                                                             |                                                                                                                                                                                                                                                                                                                                                                                                                             |  |
| Shaw et al. [37]   | Multicenter retrospective chart review | Any-line (including first-line; prior first-line treatment for second- and later-line therapy not specified) | ALK-positive (n=121)<br>ALK-negative (n=266), including 79                                        | Pem alone or as combination therapy                                                                               | <b>Plat/pem in any-line setting:</b><br>ALK-positive: 7.3 mo (95% CI 5.5–9.5).                                                                                                                                                                                              |                                                                                                                                                                                                                                                                                                                                                                                                                             |  |



|                     |                            |                                                                                    |                                                                                                   |                                     |                                                                                                                                                                                                                                                                                                                                                                                                                                                                                                                   |                                                                                                                                                                  |
|---------------------|----------------------------|------------------------------------------------------------------------------------|---------------------------------------------------------------------------------------------------|-------------------------------------|-------------------------------------------------------------------------------------------------------------------------------------------------------------------------------------------------------------------------------------------------------------------------------------------------------------------------------------------------------------------------------------------------------------------------------------------------------------------------------------------------------------------|------------------------------------------------------------------------------------------------------------------------------------------------------------------|
|                     |                            |                                                                                    | KRAS-positive and 187 KRAS-negative pts                                                           |                                     | <b>ALK-negative, KRAS-positive:</b> 4.5 mo (p=0.042 vs. ALK-positive).<br><b>ALK-negative, KRAS-negative:</b> 5.9 mo (p=0.182 vs. ALK-positive).<br><b>+ bev in combination or as part of maintenance therapy:</b> 9.5 vs. 5.5 mo for - bev (p=0.087).<br><b>Single-agent pem or non-pla/pem combination:</b><br><b>ALK-positive:</b> 5.5 mo (95% CI 2.8–9.0).<br><b>ALK-negative, KRAS-positive:</b> 7.8 mo (p=0.860 vs. ALK-positive).<br><b>ALK-negative, KRAS-negative:</b> 3.9 mo (p=0.409 vs. ALK-positive) |                                                                                                                                                                  |
| Park et al. [38]    | Cohort study               | Any-line (including first-line, and second- and later-line following chemotherapy) | ALK-positive (n=52)<br>EGFR-positive (n=188)<br>KRAS-positive (n=34)<br>Wild-type disease (n=168) | Pem alone or as combination therapy | <b>Any pem regimen any-line:</b><br><b>ALK-positive:</b> 7.8 mo<br><b>EGFR-positive:</b> 2.5 mo<br><b>KRAS-positive:</b> 2.3 mo<br><b>Wild-type:</b> 2.9 mo (p<0.001).<br><b>HR for ALK-positive vs. other groups:</b><br>0.39 vs. EGFR-positive, 0.42 vs. KRAS-positive, 0.43 vs. wild-type (p<0.001 for all comparisons)                                                                                                                                                                                        | <b>Any pem regimen any-line:</b><br><b>ALK-positive:</b> 26.9%<br><b>EGFR-positive:</b> 12.8%<br><b>KRAS-positive:</b> 8.8%<br><b>Wild-type:</b> 18.6% (p=0.046) |
| Camidge et al. [44] | Retrospective chart review | Any-line (including first-line; prior first-                                       | N=89                                                                                              | Pem alone or as combination therapy | <b>ALK-positive:</b> 9 mo (95% CI 3–12).                                                                                                                                                                                                                                                                                                                                                                                                                                                                          | <b>ALK-positive:</b> 42%<br><b>EGFR-positive:</b> 30%                                                                                                            |

|                                                                        |                                                                                                           |                                                                                                                                                                                                                                                                                                                                                                          |                                                                |
|------------------------------------------------------------------------|-----------------------------------------------------------------------------------------------------------|--------------------------------------------------------------------------------------------------------------------------------------------------------------------------------------------------------------------------------------------------------------------------------------------------------------------------------------------------------------------------|----------------------------------------------------------------|
| line treatment for<br>second- and later-line<br>therapy not specified) | ALK-positive<br>(n=19)<br>EGFR-positive<br>(n=12)<br>KRAS-positive<br>(n=21)<br>Triple-negative<br>(n=37) | <b>EGFR-positive:</b> 5.5 mo<br>(95% CI 1–9).<br><b>KRAS-positive:</b> 7 mo<br>(95% CI 1.5–10).<br><b>Triple-negative:</b> 4 mo<br>(95% CI 3–5).<br><b>Only ALK positivity<br/>associated with longer<br/>PFS:</b> HR 0.36 (95% CI<br>0.17–0.73; p=0.005).<br><b>Line of therapy<br/>associated with worse<br/>PFS on pem:</b> HR 1.57<br>(95% CI 1.07–2.13;<br>p=0.022) | <b>KRAS-positive:</b><br>37%<br><b>Triple-negative:</b><br>14% |
|------------------------------------------------------------------------|-----------------------------------------------------------------------------------------------------------|--------------------------------------------------------------------------------------------------------------------------------------------------------------------------------------------------------------------------------------------------------------------------------------------------------------------------------------------------------------------------|----------------------------------------------------------------|

Abbreviations: ALK, anaplastic lymphoma kinase; AUC, area under the concentration–time curve; bev, bevacizumab; bid, twice daily; car, carboplatin; cer, ceritinib; CI, confidence interval; cis, cisplatin; cri, crizotinib; doc, docetaxel; EGFR, epidermal growth factor receptor; HR, hazard ratio; ITT, intention-to-treat; KRAS, Kirsten rat sarcoma virus proto-oncogene; min, minute; mo, months; NSCLC, non-small-cell lung cancer; ORR, overall response rate; OS, overall survival; pem, pemetrexed; PFS, progression-free survival; pla, platinum; pts, patients; TKI, tyrosine kinase inhibitor; wks, weeks.

**Supplementary Table S5.** Summary of results from studies of pemetrexed in patients with advanced nonsquamous NSCLC and ROS or RET gene rearrangements, HER2 or KRAS mutations, or MET expression.

| Study                     | Study design                        | Line of treatment                                                          | Pts                                                                                                                      | Treatment                                          | Median PFS                                                                                                                                                                                              | Median OS                                                                                                                                                   | ORR |
|---------------------------|-------------------------------------|----------------------------------------------------------------------------|--------------------------------------------------------------------------------------------------------------------------|----------------------------------------------------|---------------------------------------------------------------------------------------------------------------------------------------------------------------------------------------------------------|-------------------------------------------------------------------------------------------------------------------------------------------------------------|-----|
| <b>ROS1 rearrangement</b> |                                     |                                                                            |                                                                                                                          |                                                    |                                                                                                                                                                                                         |                                                                                                                                                             |     |
| Song et al. [45]          | Cohort study                        | First-line                                                                 | ROS1-positive (n=12)<br>ALK-positive (n=27)<br>EGFR-positive (n=34)<br>KRAS-positive (n=22)<br>Quadruple-negative (n=27) | Pem-based therapy                                  | <b>ROS1-positive:</b> 6.8 mo<br><b>ALK-positive:</b> 6.7 mo<br><b>EGFR-positive:</b> 5.2 mo<br><b>KRAS-positive:</b> 4.2 mo<br><b>Quadruple-negative:</b> 4.5 mo<br>(difference between groups p=0.003) |                                                                                                                                                             |     |
| Kim et al. [46]           | Retrospective medical record review | Second-line (following first-line pla-based therapy)                       | N=162:<br>ROS1-positive (n=5)<br>ALK-positive (n=13)<br>ROS1/ALK-negative (n=144)                                        | Pem                                                | <b>ROS1-positive:</b> NR (p=0.008 vs. ROS1/ALK-negative).<br><b>ALK-positive:</b> 11.5 mo<br><b>ROS1/ALK-negative:</b> 3.3 mo<br><b>ROS1 predicted longer median PFS:</b> HR 0.09 (p=0.02)              | <b>ROS1-positive:</b> 60.0% (p=0.01 vs. ROS1/ALK-negative).<br><b>ALK-positive:</b> 33.3% (p=0.12 vs. ROS1/ALK-negative).<br><b>ROS1/ALK-negative:</b> 8.5% |     |
| Chen et al. [47]          | Retrospective cohort study          | Any-line (including first-line; prior first-line treatment for second- and | ROS1-positive (n=19)<br>EML4-ALK-positive (n=32)<br>EGFR-positive (n=102)                                                | Pem alone or in combination with pla-based therapy | <b>Overall:</b><br><b>ROS1-positive:</b> 7.5 mo (95% CI 0.6–14.3; log-rank p=0.003 for                                                                                                                  | <b>Overall:</b><br>ROS1-positive: 57.9% (p=0.026 for difference vs. other groups).                                                                          |     |

|                          |                                  |                                   |                                                  |                                                                                                                                                             |                                                                                                                                                                                                                                                                                                                                                                                   |                                                                                                    |
|--------------------------|----------------------------------|-----------------------------------|--------------------------------------------------|-------------------------------------------------------------------------------------------------------------------------------------------------------------|-----------------------------------------------------------------------------------------------------------------------------------------------------------------------------------------------------------------------------------------------------------------------------------------------------------------------------------------------------------------------------------|----------------------------------------------------------------------------------------------------|
|                          |                                  | later-line therapy not specified) | KRAS-positive (n=3)<br>Quadruple-negative (n=97) |                                                                                                                                                             | difference vs. other groups).<br><b>EGFR-positive:</b> 3.7 mo (95% CI 2.2–5.2).<br><b>EML4-ALK-positive:</b> 5.4 mo (95% CI 2.7–8.2).<br><b>Quadruple-negative:</b> 4.1 mo (95% CI 2.9–5.2).<br><b>ROS1-positivity associated with longer PFS:</b> HR 0.44 (95% CI 0.25–0.78; p=0.005).<br><b>EGFR-positivity associated with poorer PFS:</b> HR 1.43 (95% CI 1.04–1.96; p=0.028) | <b>EGFR-positive:</b> 25.5%<br><b>EML4-ALK-positive:</b> 28.1%<br><b>Quadruple-negative:</b> 24.7% |
| <b>RET rearrangement</b> |                                  |                                   |                                                  |                                                                                                                                                             |                                                                                                                                                                                                                                                                                                                                                                                   |                                                                                                    |
| Song et al. [48]         | Cohort study                     | First-line                        | RET-positive (n=4)<br>RET-negative (n=64)        | Pem-pla                                                                                                                                                     | <b>RET-positive:</b> 7.5 mo<br><b>RET-negative:</b> 5.0 mo (p=0.026)                                                                                                                                                                                                                                                                                                              | <b>RET-positive:</b> 58.1 mo<br><b>RET-negative:</b> 52.0 mo (p=0.504)                             |
| Shen et al. [49]         | Multicentre, retrospective study | First- or second-line             | RET-positive (n=62)                              | <b>First-line:</b><br>Pem-pla (n=19)<br>Pem monotherapy (n=3)<br>Pac-pla (n=14)<br>Gem-pla (n=4)<br><b>Second-line:</b><br>Pem-based (n=10)<br>Other (n=18) | <b>First-line:</b><br><b>Pem-based therapy:</b> 9.2 mo<br><b>Other chemotherapy:</b> 5.2 mo (p=0.007)<br>HR 0.40<br><b>Pem-based first-line treatment</b>                                                                                                                                                                                                                         | <b>Pem-based therapy (any line):</b> 35.2 mo<br><b>No pem:</b> 22.6 mo (p=0.052)<br>HR 0.39        |

|                    |                               |                                                                                                                                      |                                                                                                              |                                                                                |                                                                                                                                                                                                                                                                                                      |                                                                                                                                                                                                                                                                                                        |                                                                                                                                                                                                                                                                      |
|--------------------|-------------------------------|--------------------------------------------------------------------------------------------------------------------------------------|--------------------------------------------------------------------------------------------------------------|--------------------------------------------------------------------------------|------------------------------------------------------------------------------------------------------------------------------------------------------------------------------------------------------------------------------------------------------------------------------------------------------|--------------------------------------------------------------------------------------------------------------------------------------------------------------------------------------------------------------------------------------------------------------------------------------------------------|----------------------------------------------------------------------------------------------------------------------------------------------------------------------------------------------------------------------------------------------------------------------|
|                    |                               |                                                                                                                                      |                                                                                                              |                                                                                | <b>predicted PFS:</b><br>p=0.008.<br><b>Second -line:</b><br><b>Pem-based</b><br><b>therapy:</b> 4.9 mo<br><b>Other</b><br><b>chemotherapy:</b> 2.8<br>mo (p=0.049)<br>HR 0.44                                                                                                                       |                                                                                                                                                                                                                                                                                                        |                                                                                                                                                                                                                                                                      |
| Drilon et al. [50] | Retrospective<br>chart review | Any-line<br>(including<br>first-line; prior<br>first-line<br>treatment for<br>second- and<br>later-line<br>therapy not<br>specified) | RET-positive<br>(n=18)<br>ROS1-positive<br>(n=10)<br>ALK-positive<br>(n=36)<br>KRAS-positive<br>(n=40)       | Pem alone or as<br>combination<br>therapy (pla or<br>non-pla doublet ±<br>bev) | <b>RET-positive:</b><br>19 mo (95% CI 12–<br>NR; p=0.005 vs.<br>KRAS-positive).<br><b>ROS1-positive:</b><br>23 mo (95% CI 14–<br>NR; p=0.002 vs.<br>KRAS-positive).<br><b>ALK-positive:</b><br>19 mo (95% CI 15–<br>36; p<0.001 vs.<br>KRAS-positive).<br><b>KRAS-positive:</b><br>6 mo (95% CI 5–9) | <b>RET-positive:</b><br>NR (95% CI 24–<br>NR; p=0.004 vs.<br>KRAS-positive).<br><b>ROS1-positive:</b><br>NR (95% CI 24–<br>NR; p=0.08 vs.<br>KRAS-positive).<br><b>ALK-positive:</b><br>37 mo (95% CI<br>30–63; p<0.001<br>vs. KRAS-<br>positive).<br><b>KRAS-positive:</b><br>16 mo (95% CI<br>14–33) | <b>RET-positive:</b><br>45% (p=0.30 vs.<br>ROS1 and ALK-<br>positive; p=0.39<br>vs. KRAS-<br>positive).<br><b>ROS1-positive:</b><br>78%<br><b>ALK-positive:</b><br>50%<br><b>KRAS-positive:</b><br>26%<br>(overall<br>comparison of the<br>four subgroups<br>p=0.02) |
|                    |                               |                                                                                                                                      |                                                                                                              |                                                                                |                                                                                                                                                                                                                                                                                                      |                                                                                                                                                                                                                                                                                                        |                                                                                                                                                                                                                                                                      |
| HER2 mutations     |                               |                                                                                                                                      |                                                                                                              |                                                                                |                                                                                                                                                                                                                                                                                                      |                                                                                                                                                                                                                                                                                                        |                                                                                                                                                                                                                                                                      |
| Wang et al. [51]   | Cohort study                  | First-line                                                                                                                           | HER2-positive<br>(n=25)<br>EGFR-positive<br>(n=74)<br>ALK/ROS-<br>positive (n=39)<br>KRAS-positive<br>(n=40) | Pem-based<br>therapy                                                           | <b>HER2-positive:</b><br>5.1 mo<br>(95% CI 4.90–5.30;<br>p=0.247 vs. EGFR<br>group; p=0.004 vs.<br>ALK/ROS1 group;<br>p=0.971 vs. KRAS<br>group).<br><b>EGFR-positive:</b><br>6.5 mo                                                                                                                 |                                                                                                                                                                                                                                                                                                        | <b>HER2-positive:</b><br>36.0%<br><b>EGFR-positive:</b><br>33.8%<br><b>ALK/ROS-<br/>positive:</b> 41.3%<br><b>KRAS-positive:</b><br>35.0%<br>(p=0.896 between<br>groups)                                                                                             |
|                    |                               |                                                                                                                                      |                                                                                                              |                                                                                |                                                                                                                                                                                                                                                                                                      |                                                                                                                                                                                                                                                                                                        |                                                                                                                                                                                                                                                                      |

|                 |                                     |                      |      |                                                                                                                              |                                                                                                                                                                                                                                                                                                                                                                                                                                                                                                         |
|-----------------|-------------------------------------|----------------------|------|------------------------------------------------------------------------------------------------------------------------------|---------------------------------------------------------------------------------------------------------------------------------------------------------------------------------------------------------------------------------------------------------------------------------------------------------------------------------------------------------------------------------------------------------------------------------------------------------------------------------------------------------|
|                 |                                     |                      |      |                                                                                                                              | (95% CI 4.48–8.52).<br><b>ALK/ROS-positive:</b> 9.2 mo<br>(95% CI 6.41–11.99).<br><b>KRAS-positive:</b> 5.0 mo (95% CI 3.67–6.33; p=0.971 vs. HER2 group; p=0.242 vs. EGFR group; p=0.007 vs. ALK/ROS1 group)                                                                                                                                                                                                                                                                                           |
| Eng et al. [52] | Retrospective medical record review | First- or later-line | N=38 | Pem-based regimen (26 treatments)<br>Tax-based (19 treatments)<br>Gem-based (17 treatments)<br>HER2-targeted (28 treatments) | <b>Median duration of first-line treatment:</b><br><b>Pem-based:</b> 8.8 mo (range 1.3–21.0).<br><b>Tax-based:</b> 4.0 mo (range 0.8–20.2).<br><b>Gem-based:</b> 4.4 mo (range 2.5–11.5)<br><b>HER2-targeted:</b> 5.2 mo (range 1.3–16.3) (p=0.89 between groups).<br><b>Median duration of later-line treatment:</b><br><b>Pem-based:</b> 3.9 mo (range 0–20).<br><b>Tax-based:</b> 4.0 mo (range 0.70–16.8).<br><b>Gem-based:</b> 2.3 mo (range 0–12).<br><b>HER2-targeted:</b> 1.8 mo (range 0.3–10) |

|                     |                                                     |                                                              |                                                                  |                                                                                                                                                     |                                                                                                                                                                                                                                                                                                                                                                                                                                                                                                                                                                    |                                                                                                                                                       |
|---------------------|-----------------------------------------------------|--------------------------------------------------------------|------------------------------------------------------------------|-----------------------------------------------------------------------------------------------------------------------------------------------------|--------------------------------------------------------------------------------------------------------------------------------------------------------------------------------------------------------------------------------------------------------------------------------------------------------------------------------------------------------------------------------------------------------------------------------------------------------------------------------------------------------------------------------------------------------------------|-------------------------------------------------------------------------------------------------------------------------------------------------------|
| Gow et al. [53]     | Retrospective cohort study                          | First- or later-line                                         | N=29                                                             | Pem-based regimen (20 treatments)<br>Tax-based (29 treatments)<br>Gem-based (12 treatments)<br>Nav-based (12 treatments)<br>Gef/erl (22 treatments) | <b>Median duration of first-line treatment:</b><br><b>Pem-based:</b> 6.3 mo (range 2.3–17).<br><b>Tax-based:</b> 5.3 mo (range 1.9–10.7).<br><b>Gem-based:</b> 4.9 mo (range 2.6–7.2).<br><b>Nav-based:</b> 2.2 mo (one treatment).<br><b>Gef/erl:</b> 2.1 mo (range 1.0–11.7).<br><b>Median duration of later-line treatment:</b><br><b>Pem-based:</b> 6.0 mo (range 1.3–37.4).<br><b>Tax-based:</b> 3.2 mo (range 0.9–8.9).<br><b>Gem-based:</b> 5.4 mo (range 0.3–36.6).<br><b>Nav-based:</b> 3.3 mo (range 2.3–4.9).<br><b>Gef/erl:</b> 2.1 mo (range 1.2–6.4) | <b>Pem associated with favorable OS:</b> HR 0.48 (95% CI 0.38–0.60; p<0.001)                                                                          |
| KRAS mutations      |                                                     |                                                              |                                                                  |                                                                                                                                                     |                                                                                                                                                                                                                                                                                                                                                                                                                                                                                                                                                                    |                                                                                                                                                       |
| Gandara et al. [54] | Phase Ib multicenter open-label nonrandomized study | Mainly second- or third-line (prior treatment not specified) | KRAS-positive (n=48)<br>KRAS-negative/KRAS status unknown (n=41) | Pem (500 mg/m <sup>2</sup> every 3 wks) + tra (1.5 mg daily) (n=42)<br>or<br>Doc (75 mg/m <sup>2</sup> every 3 wks) + tra (2.0 mg daily) (n=47)     | <b>Pem + tra:</b><br><b>KRAS-positive:</b> 4.0 mo (95% CI 1.3–8.4) (n=23).<br><b>KRAS-negative/status unknown:</b> 5.8 mo                                                                                                                                                                                                                                                                                                                                                                                                                                          | <b>Pem + tra:</b><br><b>KRAS-positive:</b> 17% (95% CI 5.0–38.8).<br><b>KRAS-negative/status unknown:</b> 11% (95% CI 1.3–33.1).<br><b>Doc + tra:</b> |

|                     |                                                                                            |            |                                |                                                                                                                                                                                                                     |                                                                                                                                                                                                                                                                                                                      |                                                                                                                                                                                                                                                                                                                |                                                                       |
|---------------------|--------------------------------------------------------------------------------------------|------------|--------------------------------|---------------------------------------------------------------------------------------------------------------------------------------------------------------------------------------------------------------------|----------------------------------------------------------------------------------------------------------------------------------------------------------------------------------------------------------------------------------------------------------------------------------------------------------------------|----------------------------------------------------------------------------------------------------------------------------------------------------------------------------------------------------------------------------------------------------------------------------------------------------------------|-----------------------------------------------------------------------|
|                     |                                                                                            |            |                                |                                                                                                                                                                                                                     | (95% CI 2.8–7.1)<br>(n=19).<br><b>Doc + tra:</b><br><b>KRAS-positive:</b><br>3.4 mo<br>(95% CI 1.5–6.3)<br>(n=25).<br><b>KRAS-</b><br><b>negative/status</b><br><b>unknown:</b><br>4.2 mo<br>(95% CI 2.2–11.0)<br>(n=22)                                                                                             | <b>KRAS-positive:</b><br>24%<br>(95% CI 9.4–45.1).<br><b>KRAS-</b><br><b>negative/status</b><br><b>unknown:</b> 18%<br>(95% CI 5.2–40.3)                                                                                                                                                                       |                                                                       |
| MET expression      |                                                                                            |            |                                |                                                                                                                                                                                                                     |                                                                                                                                                                                                                                                                                                                      |                                                                                                                                                                                                                                                                                                                |                                                                       |
| Wakelee et al. [55] | Phase II<br>randomized<br>multicenter<br>double-blind PL-<br>controlled study<br>(GO27821) | First-line | N=259, of whom<br>73 were MET+ | Pem/pla/ona<br>(n=59, of whom 36<br>were MET+)<br>Pem/pla/PL (n=61,<br>of whom 37 were<br>MET+)<br>Bev/pac/pla/ona<br>(n=69)<br>Bev/pac/pla/PL<br>(n=70).<br>Results only<br>presented for<br>pem-based<br>regimens | <b>Pem/pla/ona:</b><br>4.9 mo<br>(95% CI 4.4–5.9).<br><b>Pem/pla/PL:</b> 5.1 mo<br>(95% CI 4.6–7.0).<br>Stratified HR 1.23<br>(p=0.329).<br><b>Pem/pla/ona</b><br><b>MET+:</b> 5.0 mo<br>(95% CI 4.5–6.0).<br><b>Pem/pla/PL MET+:</b><br>5.0 mo<br>(95% CI 3.7–7.2)<br>Unstratified HR<br>1.25<br>(95% CI 0.72–2.15) | <b>Pem/pla/ona:</b><br>8.5 mo (95% CI<br>6.8–13.2).<br><b>Pem/pla/PL:</b><br>13.7 mo<br>(95% CI 6.6–not<br>evaluable).<br>Stratified HR<br>1.15 (p=0.591).<br><b>Pem/pla/ona</b><br><b>MET+:</b> 8.0 mo<br>(95% CI 6.8–<br>13.2).<br><b>Pem/pla/PL</b><br><b>MET+:</b> 7.6 mo<br>(95% CI 5.9–not<br>evaluable) | <b>Pem/pla/ona:</b><br>28.6%<br><b>Pem/pla/PL:</b><br>36.1% (p=0.389) |

Abbreviations: ALK, anaplastic lymphoma kinase; bev, bevacizumab; CI, confidence interval; doc, docetaxel; EGFR, epidermal growth factor receptor; erl, erlotinib; gef, gefitinib; gem, gemcitabine; HER2, human epidermal growth factor receptor 2; HR, hazard ratio; KRAS, Kirsten rat sarcoma virus proto-oncogene; MET, tyrosine protein kinase; mo, months; nav, navelbine; NR, not reached; NSCLC, non-small-cell lung cancer; ona, onartuzumab; ORR, overall response rate; OS, overall survival; pac,



31 paclitaxel; pem, pemetrexed; PFS, progression-free survival; PL, placebo; pla, platinum; pts, patients; RET, rearranged during transfection proto-oncogene; ROS1, ROS  
32 proto-oncogene 1; tax, taxane; tra, trametinib; wks, weeks.
